# Supplementary material for: Separate Introns Gained within Short and Long Soluble Peridinin-Chlorophyll a-Protein Genes during Radiation of Symbiodinium (Dinophyceae) Clade A and B Lineages
Source: PubMed Central journal article supplement (PMC4201569; doi:10.1371/journal.pone.0110608), 2014-10-17

A

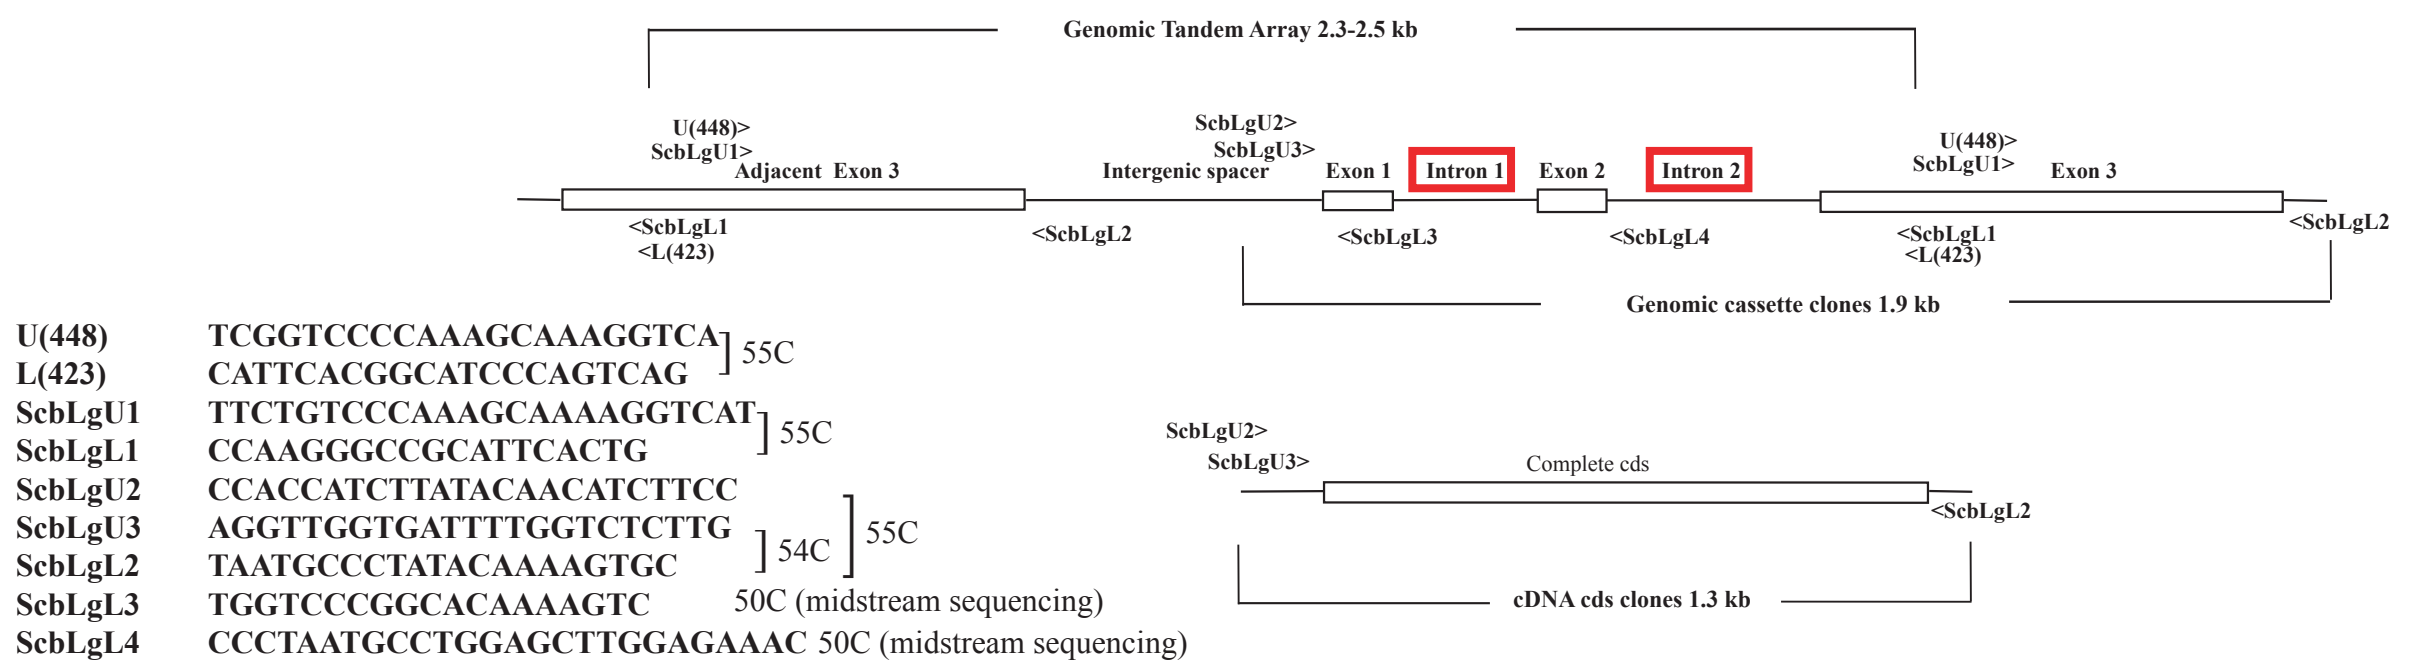

B

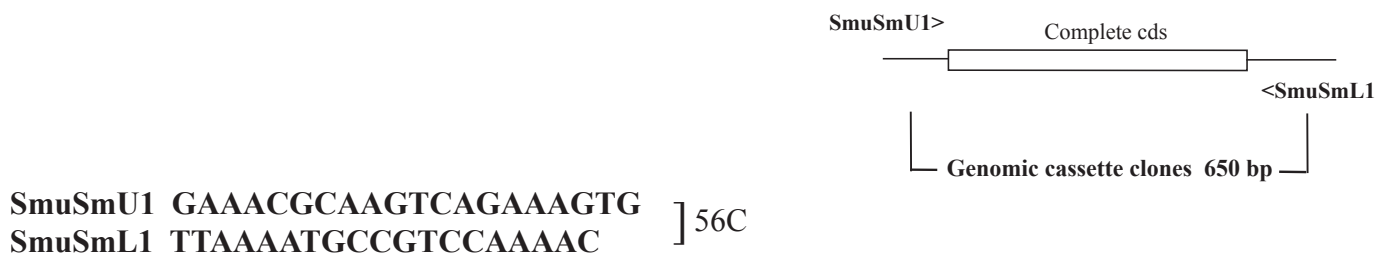

C

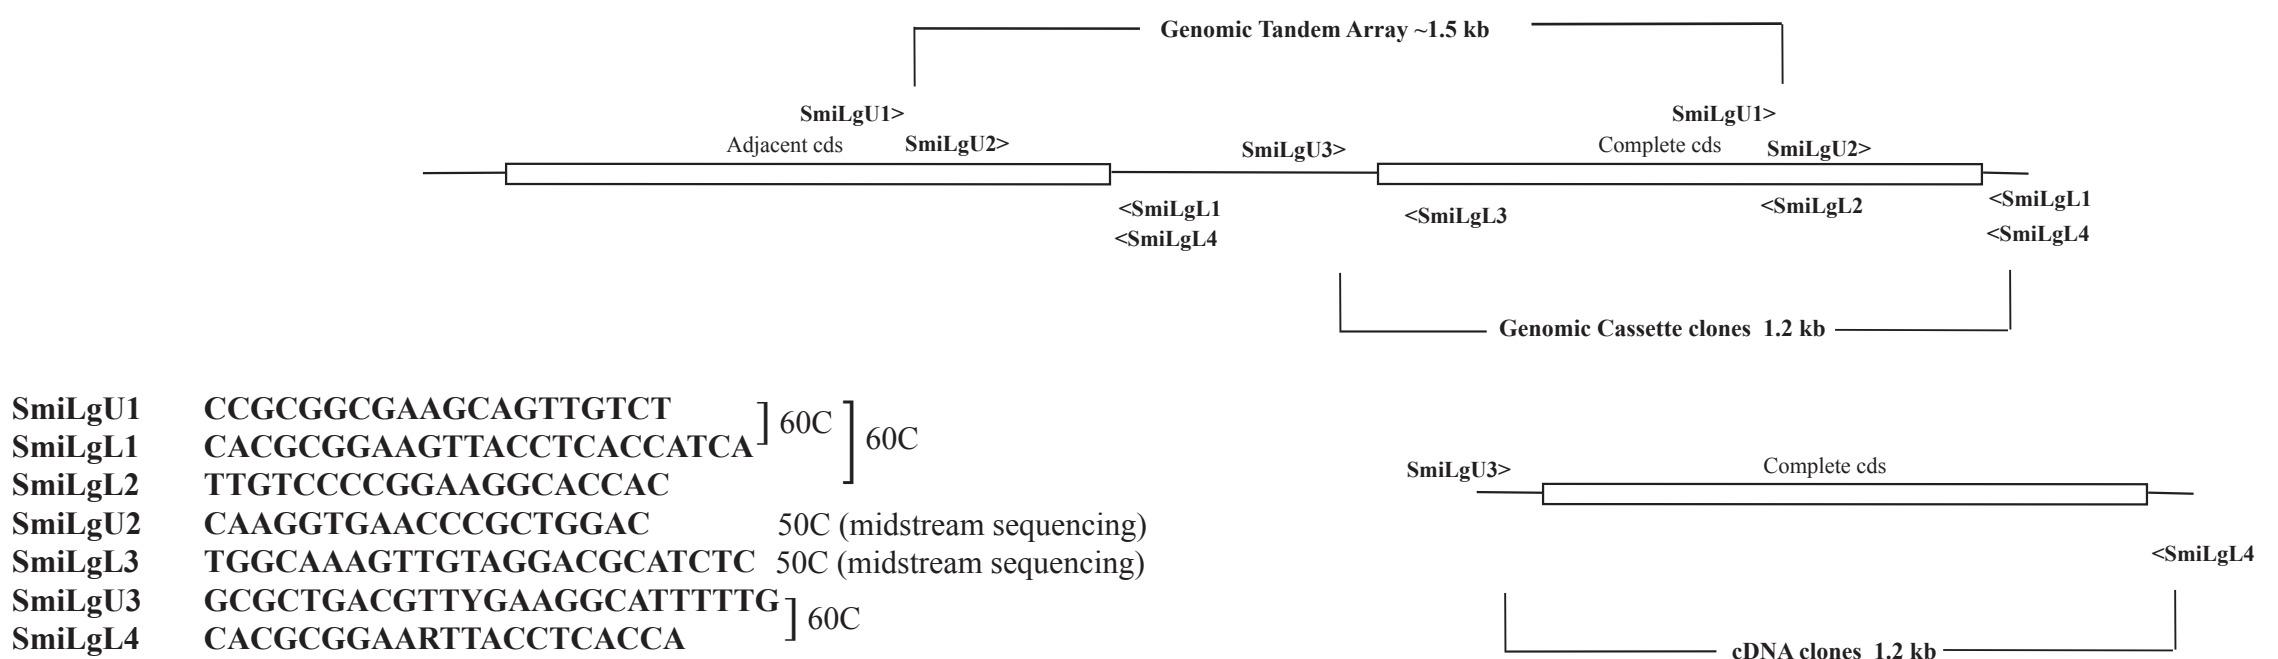

D

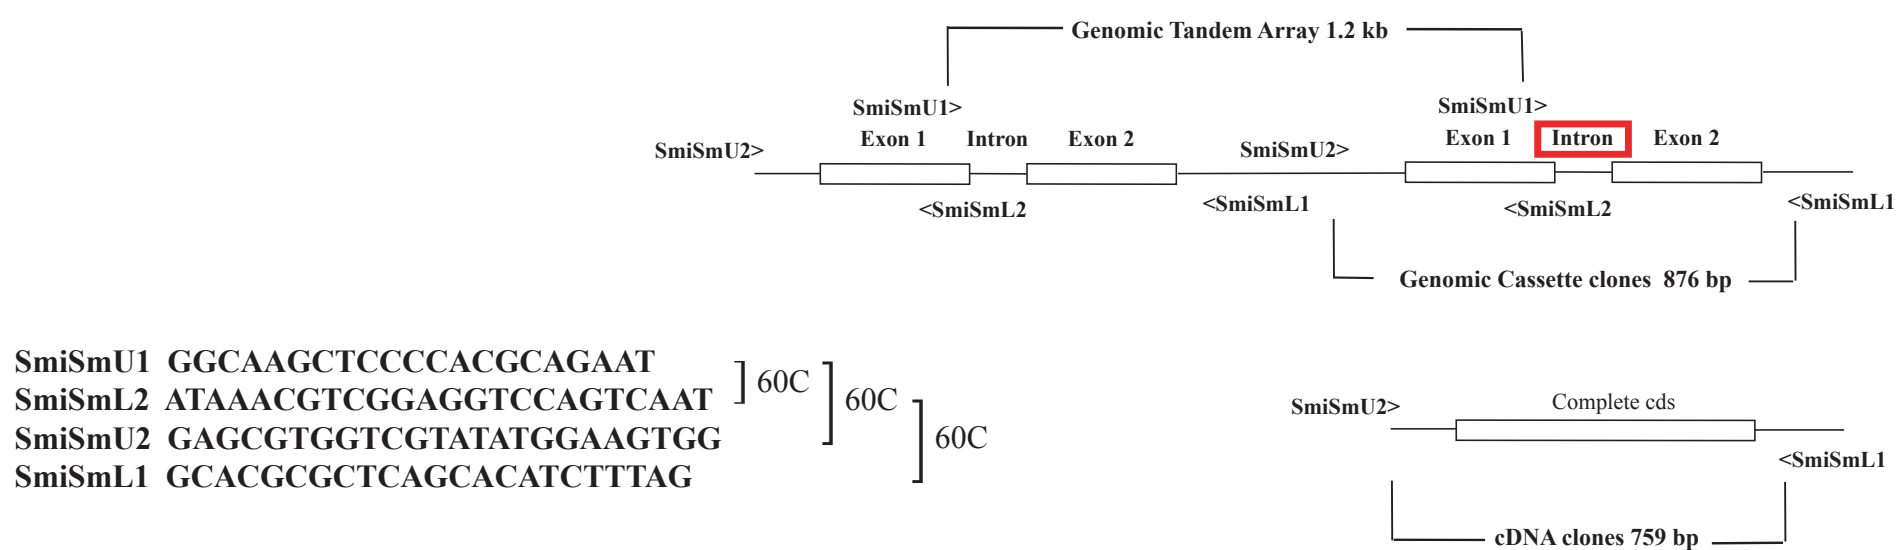

E

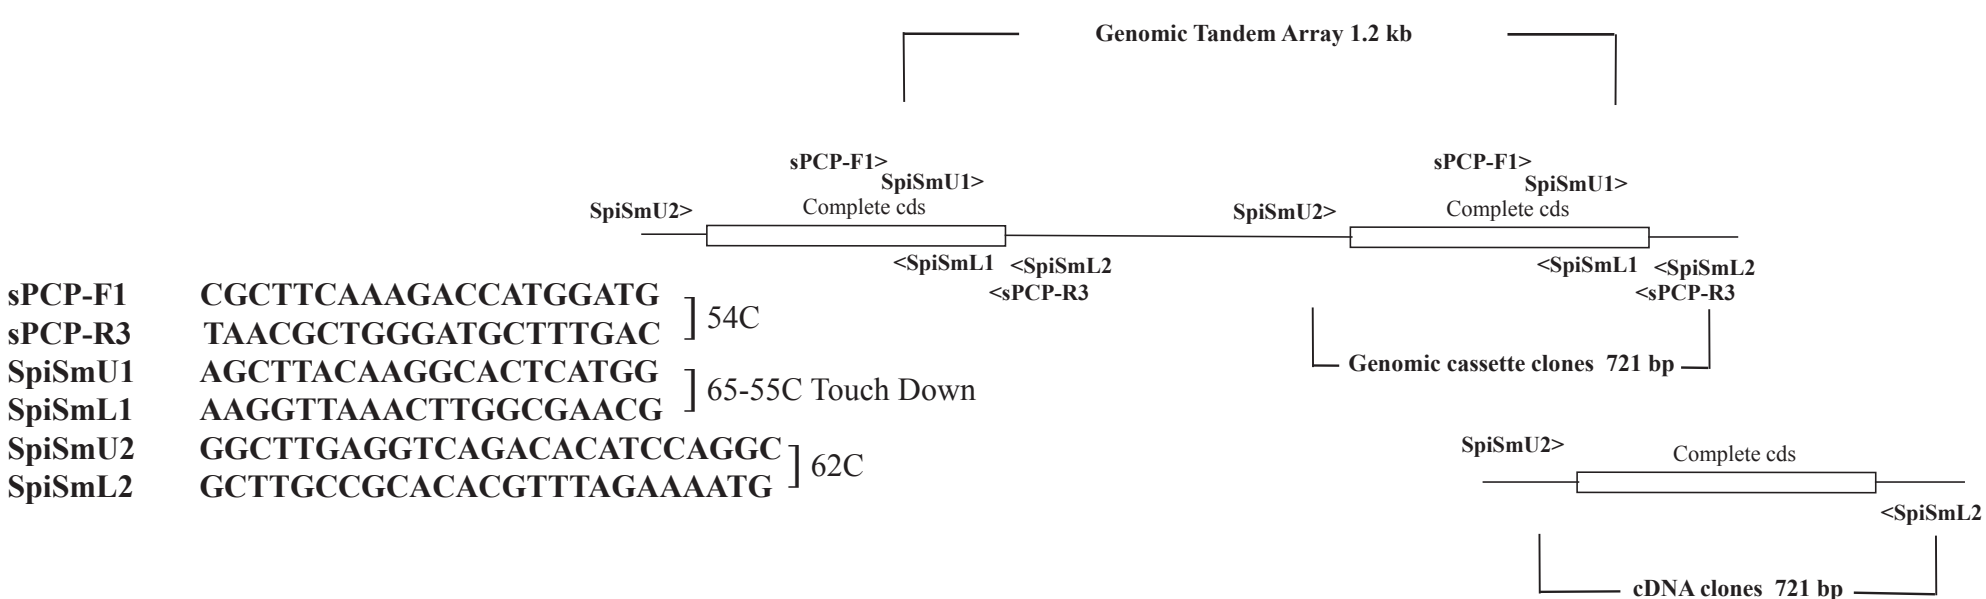

F

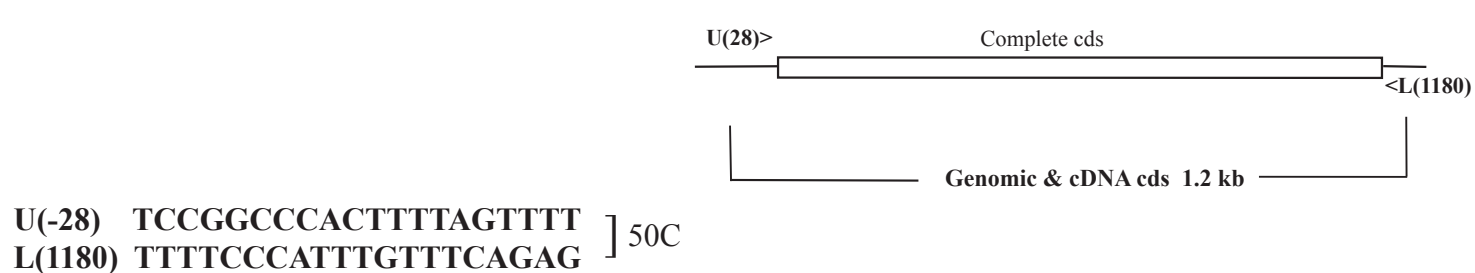

Supplement: pone.0110608.s003.pdf [file pone.0110608.s003.pdf]
