# Supplementary material for: Separate Introns Gained within Short and Long Soluble Peridinin-Chlorophyll a-Protein Genes during Radiation of Symbiodinium (Dinophyceae) Clade A and B Lineages
Source: PubMed Central journal article supplement (PMC4201569; doi:10.1371/journal.pone.0110608), 2014-10-17
Supplement: pone.0110608.s004.pdf [file pone.0110608.s004.pdf]

## A

Dstok28 genomic  
Dstrig102 genomic  
Apl genomic  
FLAp2-10AB genomic  
Pe genomic  
Pk702 genomic  
SSPe genomic  
*Symbiodinium minutum* Pd genomic  
*Symbiodinium psymophilum* HIAP genomic  
*Symbiodinium psymophilum* PurPFlex genomic  
Zp genomic  
Apl cDNA  
FLAp2-10AB cDNA  
Pe cDNA  
Pk702 cDNA  
SSPe cDNA  
*Symbiodinium minutum* Pd cDNA  
*Symbiodinium psymophilum* HIAP cDNA  
*Symbiodinium psymophilum* PurPFlex cDNA  
Zp cDNA  
Codon Position  
  
Amino acids

```
GCTGGCGCAGCTGCTGgtacctaggttctt>>>aa.tgttg...tcagGTGTGATGATGGCT
GCCGGCGCAGCTGCTGgtacctaggttctt>>>aa.tgttggcagtcagGTGTGATGATGGCT
GCTGGCGCAGCTGCTGgtacctaggttctt>>>aaatggtggcagtcagGTGTGATGATGGCT
GCTGGCGCAGCTGCTGgtacctaggttctt>>>aaatggtggcagtaagGTGTGATGATGGCT
GCTGGCGCAGCTGCTGgtacctaggttctt>>>aa.tgttggcagtcagGTGTGATGATGGCT
GCCGGCGCAGCTGCTGgtatctaggttctt>>>aa.tgttggcagtcagGTGTGATGATGGCT
GCTGGCGCAGCTGCTGgtacctaggttctt>>>aa.tgttggcagtcagGTGTGATGATGGCT
GCTGGCGCAGCTGCTGgtacctaggttctt>>>aaatggtggcagtcagGTGTGATGATGGCT
GCCGGCGCAGCTGCTGgtacctaggttctt>>>aa.tgttggcagtcagGTGTGATGATGGCT
GCCGGCGCAGCTGCTGgtacctaggtctt>>>aa.tgttggcagtcagGTGTGATGATGGCT
GCTGGCGCAGCTGCTGgtacctaggttctt>>>aa.tgttggcagtcagGTGTGATGATGGCT
GCTGGCGCAGCTGCTG.....>>>.....GTGTGATGATGGCT
GCTGGCGCAGCTGCTG.....>>>.....GTGTGATGATGGCT
GCTGGCGCAGCTGCTG.....>>>.....GTGTGATGATGGCT
GCCGGCGCAGCTGCTG.....>>>.....GTGTGATGATGGCT
GCCGGCGCAGCTGCTG.....>>>.....GTGTGATGATGGCT
GCTGGTGCAGCTGCTG.....>>>.....GTGTGATGATGGCT
GCTGGTGCAGCTGCTG.....>>>.....GTGTGATGATGGCT
GCTGGTGCAGCTGCTG.....>>>.....GTGTGATGATGGCT
GCTGGTGCAGCTGCTG.....>>>.....GTGTGATGATGGCT
GCTGGTGCAGCTGCTG.....>>>.....GTGTGATGATGGCT
1231231231231231                23123123123123
| | | | |                          | | | | |
A G A A A                          G V M M A
```

## B

Dstok28 genomic  
Dstrig102 genomic  
Apl genomic  
FLAp2-10AB genomic  
Pe genomic  
Pk702 genomic  
SSPe genomic  
*Symbiodinium minutum* Pd genomic  
*Symbiodinium psymophilum* HIAP genomic  
*Symbiodinium psymophilum* PurPFlex genomic  
Zp genomic  
Apl cDNA  
FLAp2-10AB cDNA  
Pe cDNA  
Pk702 cDNA  
SSPe cDNA  
*Symbiodinium minutum* Pd cDNA  
*Symbiodinium psymophilum* HIAP cDNA  
*Symbiodinium psymophilum* PurPFlex cDNA  
Zp cDNA  
Codon Position  
  
Amino acids

```
TTTCTCCAAGCTCCAGgcattagggcattgg>>>gttgccctggtggtgagGCTCGTTTCAGCCA
TTTCTCCAAGCTCCAGgcattagggcattagg>>>gttacctggtgcccagGCTCGTTTCAGCCA
TTTCTCCAAGCTCCAGgcattagggcattgg>>>gttgccctggtggtgagGCTCGTTTCAGCCA
TTTCTCCAAGCTCCAGgcattagggcattgg>>>gttgccctggtggtgagGCTCGTTTCAGCCA
TTTCTCCAAGCTCCAGgcattagggcattgg>>>gttgccctggtggtgagGCTCGTTTCAGCCA
TTTCTCCAAGCTCCAGgcattagggcattagg>>>gttacctggtgcccagGCTCGTTTCAGCCA
TTTCTCCAAGCTCCAGgcattagggcattagg>>>gttacctggtgcccagGCTCGTTTCAGCCA
TTTCTCCAAGCTCCAGgcattagggcattgg>>>gttgccctggtggtgagGCTCGTTTCAGCCA
TTTCTCCAAGCTCCAG.....>>>.....GCTCGTTTCAGCCA
TTTCTCCAAGCTCCAG.....>>>.....GCTCGTTTCAGCCA
TTTCTCCAAGCTCCAG.....>>>.....GCTCGTTTCAGCCA
TTTCTCCAAGCTCCAG.....>>>.....GCTCGTTTCAGCCA
TTTCTCCAAGCTCCAG.....>>>.....GCTCGTTTCAGCCA
TTTCTCCAAGCTCCAG.....>>>.....GCTCGTTTCAGCCA
TTTCTCCAAGCTCCAG.....>>>.....GCTCGTTTCAGCCA
TTTCTCCAAGCTCCAG.....>>>.....GCTCGTTTCAGCCA
1231231231231231                23123123123123
| | | | |                          | | | | |
F L Q A P                          G S F Q P
```

## C

*Symbiodinium microadriaticum* genomic  
*Symbiodinium microadriaticum* cDNA  
Codon Position  
  
Amino acids

```
TTGGATGTGCTCAAGgcattgatccccatt>>>ccgagaacatcgtagGCCATCGACACCATG
TTGGATGTGCTCAAG.....>>>.....GCCATCGACACCATG
1231231231231231                123123123123123
| | | | |                          | | | | |
L D V L K                          A I D T M
```
