# Supplementary material for: Separate Introns Gained within Short and Long Soluble Peridinin-Chlorophyll a-Protein Genes during Radiation of Symbiodinium (Dinophyceae) Clade A and B Lineages
Source: PubMed Central journal article supplement (PMC4201569; doi:10.1371/journal.pone.0110608), 2014-10-17
Supplement: pone.0110608.s007.pdf [file pone.0110608.s007.pdf]

**Table S1.** Dinoflagellate taxa and GenBank accessions used for comparisons in this study

| Suessiales           | Isolate                                                    | Symbiodinium Invertebrate Host & Geographical Location                  | Symbiodinium Clade B Phylogenetic Marker |                       |          | Dinoflagellate sPCP Sequences |                                        |                        |
|----------------------|------------------------------------------------------------|-------------------------------------------------------------------------|------------------------------------------|-----------------------|----------|-------------------------------|----------------------------------------|------------------------|
|                      |                                                            |                                                                         | ITS1-ITS2                                | CA4.86                | Si15     | sPCP size                     | sPCP genomic                           | sPCP cDNA              |
|                      | <i>Symbiodinium</i> sp. Dstok28 (B / B1 / B184)            | <i>Dichocoenia stokesii</i> (Scleractinaria) Bock Cay, Bahamas          | JN602458                                 | JN602470              | JN602468 | Long                          | JN602521-JN602528                      | (N/A)                  |
|                      | <i>Symbiodinium</i> sp. Dstrig102 (B / B19)                | <i>Diploria strigosa</i> (Scleractinaria) Lee Stocking Island, Bahamas  | JN602456                                 | JN602473              | JN602467 | Long                          | JN602517-JN602520                      | (N/A)                  |
|                      | <i>Symbiodinium muscatinei</i> (B / B4)                    | <i>Anthopleura elegantissima</i> (Actiniaria) Central Oregon Coast, USA | JN602454                                 | (null)                | (null)   | Short                         | JN602614-JN602617                      | AF42573 <sup>3</sup>   |
|                      | <i>Symbiodinium</i> sp. Ap1 (B / B1 / B184)                | <i>Aiptasia pulchella</i> (Actiniaria) Sesoko Jima, Japan               | JN602457                                 | JN602474              | JN602469 | Long                          | JN602529, JN602530, JN602532, JN602533 | JN602590-JN602600      |
|                      | <i>Symbiodinium</i> sp. FLAp2-10AB (B / B1 / B184)         | <i>Aiptasia pallida</i> (Actiniaria) Long Key, Florida, USA             | JN602455                                 | JN602472              | JN602466 | Long                          | JN602510, JN602512, JN602514-JN602516  | JN602576-JN602589      |
|                      | <i>Symbiodinium minutum</i> Pd (B / B1 / B184)             | <i>Pocillopora damicornis</i> (Scleractinaria) Kaneohe Bay, Hawaii, USA | AF360565 <sup>4</sup>                    | AY264305 <sup>5</sup> | JN602464 | Long                          | JN602497, JN602498, JN602500-JN602502  | JN602567-JN602573      |
|                      | <i>Symbiodinium</i> sp. Pe (B / B1 / B184)                 | <i>Porites evermanni</i> (Scleractinaria) Kaneohe Bay, Hawaii, USA      | AF360566 <sup>4</sup>                    | JN602475              | JN602463 | Long                          | JN602494-JN602496, JN602499            | JN602557-JN602566      |
|                      | <i>Symbiodinium</i> sp. Pk702 (B / B19 / B211)             | <i>Plexaura kuna</i> (Gorgonacea) San Blas, Panama                      | AF360575 <sup>4</sup>                    | AF474167 <sup>6</sup> | JN602462 | Long                          | JN602489, JN602491-JN602493            | JN602601-JN602613      |
|                      | <i>Symbiodinium psygmoophilum</i> HIAP (B / B2 / B224)     | <i>Aiptasia pulchella</i> (Actiniaria) Kaneohe Bay, Hawaii, USA         | AF360564 <sup>4</sup>                    | (null)                | JN602465 | Long                          | JN602510, JN602511, JN602513           | JN602574, JN602575     |
|                      | <i>Symbiodinium psygmoophilum</i> PurPflax (B / B2 / B224) | <i>Plexaura flexuosa</i> (Gorgonacea) Tennessee Reef, Florida, USA      | AF360574 <sup>4</sup>                    | (null)                | JN602461 | Long                          | JN602485-JN602488, JN602490            | JN602544-JN602556      |
|                      | <i>Symbiodinium</i> sp. SSPe (B / B1 / B184)               | <i>Pseudoterogorgia elisabethae</i> (Gorgonacea) San Salvador, Bahamas  | AF360570 <sup>4</sup>                    | AY264307 <sup>5</sup> | JN602460 | Long                          | JN602479, JN602481-JN602484            | JN602538-JN602543      |
|                      | <i>Symbiodinium</i> sp. Zp (B / B1 / B184)                 | <i>Zonathus pacificus</i> (Zoantharia) Kaneohe Bay, Hawaii, USA         | JN602453                                 | JN602471              | JN602459 | Long                          | JN602476-JN602478, JN602480, JN602531  | JN602534-JN602537      |
|                      | <i>Symbiodinium pilosum</i> 185 (A / A2)                   | <i>Zonathus sociatus</i> (Zoantharia) Discovery Bay, Jamaica            |                                          |                       |          | Short                         | AY149140-AY149147 <sup>7</sup>         | JN602618-JN602624      |
|                      | <i>Symbiodinium microadriaticum</i> 61 (A / A1)            | <i>Cassiopeia xamachana</i> (Rhizostomeae) Florida Keys, USA            |                                          |                       |          | Long                          | JN602625-JN602628                      | JN602629-JN602633      |
|                      | <i>Symbiodinium</i> sp. 203 (C / C2)                       | <i>Hippopus hippopus</i> (Bivalvia) Republic of Palau                   |                                          |                       |          | Short                         | JN602634-JN602642                      | JN602643-JN602648      |
|                      | <i>Symbiodinium kawagutii</i> 135 (F / F1)                 | <i>Montipora capitata</i> (Scleractinaria) Kaneohe Bay, Hawaii, USA     |                                          |                       |          | Long                          | AY149163-AY149172 <sup>7</sup>         | JN602649-JN602659      |
|                      | <i>Symbiodinium</i> sp. (N/A)                              | <i>Acropora formosa</i> (Scleractinaria) Magnetic Island, Australia     |                                          |                       |          | Long                          |                                        | L13613 <sup>8</sup>    |
| <b>Gonyaucales</b>   |                                                            |                                                                         |                                          |                       |          |                               |                                        |                        |
|                      | <i>Lingulodinium polyedra</i>                              | (Free-living)                                                           |                                          |                       |          | Long                          | U93077 <sup>9</sup>                    |                        |
|                      | <i>Alexandrium tamarense</i>                               | (Free-living)                                                           |                                          |                       |          | Long                          |                                        | AY847685 <sup>10</sup> |
| <b>Gymnodiniales</b> |                                                            |                                                                         |                                          |                       |          |                               |                                        |                        |
|                      | <i>Amphidinium caterae</i>                                 | (Free-living)                                                           |                                          |                       |          | Long                          | Z50793 <sup>11</sup>                   |                        |
| <b>Peridinales</b>   |                                                            |                                                                         |                                          |                       |          |                               |                                        |                        |
|                      | <i>Heterocapsa pygmaea</i>                                 | (Free-living)                                                           |                                          |                       |          | Short                         | AJ298193 <sup>12</sup>                 |                        |

1 [23], 2 [24], 3 [65], 4 [97], 5 [40], 6 [98], 7 [57], 8 [53], 9 [54], 10 [55], 11 [56]
